# Supplementary material for: Impact of the CFTR-Potentiator Ivacaftor on Airway Microbiota in Cystic Fibrosis Patients Carrying A G551D Mutation
Source: PubMed Central journal article supplement (PMC4390299; doi:10.1371/journal.pone.0124124), 2015-04-08
Supplement: pone.0124124.s006.pdf [file pone.0124124.s006.pdf]

**S1 Table. Coordinates and Cosine square (Cos<sup>2</sup>) of variables on F1 and F2 axes.**

| Variables* | Coordinates  |              | Cos <sup>2</sup> |      |         |
|------------|--------------|--------------|------------------|------|---------|
|            | F1           | F2           | F1               | F2   | F1 + F2 |
| Ge         | -0.47        | <b>0.59</b>  | 0.22             | 0.34 | 0.56    |
| Ha1        | <b>-0.65</b> | <b>0.67</b>  | 0.43             | 0.45 | 0.87    |
| Sta        | <b>-0.51</b> | <b>-0.57</b> | 0.26             | 0.33 | 0.58    |
| Pre1       | <b>0.74</b>  | 0.37         | 0.54             | 0.14 | 0.68    |
| Str1       | 0.16         | -0.04        | 0.02             | 0.00 | 0.03    |
| Pept       | <b>0.78</b>  | 0.18         | 0.60             | 0.03 | 0.64    |
| Str2       | <b>0.54</b>  | 0.48         | 0.29             | 0.23 | 0.53    |
| Neis1      | <b>-0.65</b> | <b>0.69</b>  | 0.43             | 0.47 | 0.90    |
| Fus1       | 0.44         | 0.47         | 0.19             | 0.22 | 0.42    |
| Rot1       | <b>0.56</b>  | 0.21         | 0.31             | 0.04 | 0.35    |
| Vei1       | -0.34        | <b>0.89</b>  | 0.11             | 0.79 | 0.90    |
| Por1       | <b>0.62</b>  | 0.28         | 0.38             | 0.08 | 0.46    |
| Neis2      | <b>-0.70</b> | <b>0.67</b>  | 0.50             | 0.45 | 0.94    |
| Pre2       | <b>0.90</b>  | 0.29         | 0.81             | 0.09 | 0.89    |
| Rot2       | <b>0.52</b>  | 0.27         | 0.27             | 0.07 | 0.35    |
| Str3       | <b>-0.57</b> | 0.28         | 0.32             | 0.08 | 0.40    |
| Other      | -0.27        | <b>-0.62</b> | 0.07             | 0.38 | 0.45    |
| qPCR       | <b>-0.63</b> | 0.07         | 0.39             | 0.00 | 0.40    |
| FEV1       | <b>0.72</b>  | 0.15         | 0.51             | 0.02 | 0.53    |
| Chao1      | -0.32        | 0.46         | 0.10             | 0.21 | 0.32    |
| ObsSp      | -0.34        | <b>0.56</b>  | 0.11             | 0.32 | 0.43    |
| Shan       | 0.18         | <b>0.68</b>  | 0.03             | 0.47 | 0.50    |
| PDwt       | -0.10        | <b>0.50</b>  | 0.01             | 0.25 | 0.26    |

\*Relative abundance of:

Ge: *Gemella*

Ha1: *Haemophilus*1

Sta: *Staphylococcus aureus*

Pre1: *Prevotella* 1

Str1: *Streptococcus* 1 (*S. mitis* group)

Pept: *Peptostreptococcus*

Str2: *Streptococcus* 2 (*S. salivarius* group)

Neis1: *Neisseria* 1

Fus1: *Fusobacterium* 1

Rot1: *Rothia* 1

Vei1: *Veillonella* 1

Por1: *Pophyromonas* 1

Neis2: *Neisseria* 2

Pre2: *Prevotella* 2

Rot2: *Rothia* 2

Str3: *Streptococcus* 3 (*S. anginosus* group)

Other: OTUs not included in core microbiota

ObsSp: Observed species

Shan: Shannon

PDwt: Phylogenetic diversity whole tree
