# Supplementary material for: Impact of the CFTR-Potentiator Ivacaftor on Airway Microbiota in Cystic Fibrosis Patients Carrying A G551D Mutation
Source: PubMed Central journal article supplement (PMC4390299; doi:10.1371/journal.pone.0124124), 2015-04-08
Supplement: pone.0124124.s007.pdf [file pone.0124124.s007.pdf]

**S2 Table. Quantitative variables used for statistical analysis and p-values on Colin White test for all samples, comparing the BT (before treatment) and AT (after treatment) groups for relative abundance of OTUs.**

| Sample  | Group | qPCR  | Ge    | Ha1   | Sta   | Pre1  | Str1  | Pept  | Str2  | Neis1 | Fus1  | Rot1  | Vei1  | Por1  | Neis2 | Pre2  | Rot2  | Str3  | Other | Chao1 | ObsSp | Shan  | PDwt  |       |
|---------|-------|-------|-------|-------|-------|-------|-------|-------|-------|-------|-------|-------|-------|-------|-------|-------|-------|-------|-------|-------|-------|-------|-------|-------|
| GM1     | BT    | 9.11  | 57    | 0     | 935   | 0     | 8397  | 0     | 21    | 0     | 0     | 608   | 0     | 0     | 0     | 0     | 164   | 1451  | 3222  | 18    | 18.0  | 1.9   | 1.713 |       |
| GM2     | BT    | 9.67  | 463   | 74    | 193   | 4     | 1097  | 71    | 20    | 140   | 207   | 71    | 36    | 86    | 51    | 6     | 29    | 194   | 12113 | 84.98 | 73.1  | 1.7   | 5.989 |       |
| PM1     | BT    | 9.09  | 841   | 513   | 1     | 838   | 3699  | 262   | 49    | 259   | 119   | 1621  | 687   | 175   | 397   | 1647  | 445   | 449   | 2853  | 68.52 | 67.3  | 4.1   | 5.433 |       |
| PM2     | BT    | 8.94  | 497   | 277   | 0     | 184   | 4236  | 134   | 282   | 617   | 296   | 2920  | 401   | 163   | 303   | 689   | 752   | 852   | 2252  | 72.21 | 65.2  | 3.8   | 5.487 |       |
| RM2     | BT    | 8.63  | 1694  | 0     | 50    | 1001  | 6053  | 68    | 379   | 0     | 301   | 1358  | 247   | 0     | 0     | 146   | 365   | 915   | 2278  | 50.73 | 47.3  | 3.3   | 4.476 |       |
| RM4     | BT    | 8.11  | 194   | 0     | 1129  | 1081  | 3714  | 18    | 118   | 0     | 173   | 1284  | 98    | 37    | 8     | 2298  | 422   | 724   | 3557  | 68.93 | 60.4  | 3.8   | 5.191 |       |
| RM5     | BT    | 8.16  | 305   | 0     | 376   | 376   | 4970  | 175   | 554   | 0     | 2798  | 658   | 9     | 134   | 0     | 1424  | 241   | 3     | 2832  | 72.43 | 57.5  | 3.5   | 5.637 |       |
| RM6     | BT    | 8.47  | 767   | 0     | 2432  | 1007  | 5788  | 0     | 76    | 2     | 110   | 1315  | 190   | 4     | 24    | 47    | 482   | 475   | 2136  | 55.41 | 55.0  | 3.2   | 4.664 |       |
| GM3     | AT    | 9.53  | 1091  | 853   | 83    | 57    | 3292  | 101   | 35    | 2661  | 168   | 224   | 425   | 749   | 1139  | 95    | 54    | 531   | 3297  | 92.71 | 84.9  | 3.9   | 6.39  |       |
| GM4     | AT    | 9.30  | 23    | 19    | 101   | 1     | 65    | 3     | 0     | 54    | 15    | 6     | 14    | 38    | 8     | 1     | 1     | 14    | 14492 | 61.29 | 38.1  | 1.0   | 3.883 |       |
| GM5     | AT    | 9.39  | 577   | 762   | 4     | 23    | 3137  | 42    | 23    | 1455  | 540   | 188   | 193   | 1100  | 4448  | 94    | 55    | 527   | 1687  | 78    | 75.0  | 3.5   | 5.788 |       |
| GM6     | AT    | 9.60  | 373   | 2054  | 10    | 172   | 2758  | 131   | 38    | 2646  | 650   | 599   | 496   | 1172  | 1191  | 610   | 188   | 412   | 1355  | 82.65 | 76.1  | 3.8   | 6.038 |       |
| GM7     | AT    | 9.28  | 1533  | 706   | 41    | 43    | 2607  | 73    | 13    | 1059  | 867   | 136   | 152   | 482   | 2010  | 39    | 51    | 386   | 4657  | 95.24 | 91.6  | 3.9   | 7.197 |       |
| PM3     | AT    | 9.04  | 305   | 663   | 0     | 139   | 1461  | 39    | 3171  | 3685  | 641   | 492   | 412   | 277   | 1067  | 444   | 119   | 127   | 1813  | 82.04 | 77.2  | 3.8   | 5.969 |       |
| PM4     | AT    | 8.97  | 45    | 0     | 4     | 171   | 2589  | 1358  | 115   | 0     | 489   | 2065  | 10    | 1538  | 0     | 3779  | 462   | 87    | 2143  | 52.45 | 49.1  | 3.5   | 4.921 |       |
| PM5     | AT    | 8.53  | 341   | 0     | 1     | 481   | 3336  | 512   | 32    | 0     | 564   | 3749  | 32    | 561   | 0     | 1723  | 980   | 82    | 2461  | 65.2  | 55.2  | 3.5   | 5.236 |       |
| PM6     | AT    | 9.61  | 42    | 0     | 1     | 114   | 4005  | 511   | 18    | 0     | 193   | 1654  | 29    | 4556  | 0     | 1264  | 434   | 299   | 1735  | 65.3  | 48.1  | 3.1   | 4.923 |       |
| RM7     | AT    | 8.26  | 302   | 0     | 8     | 1886  | 2052  | 254   | 565   | 0     | 2918  | 994   | 59    | 1623  | 0     | 752   | 300   | 1     | 3141  | 60.71 | 55.8  | 4.0   | 5.436 |       |
| RM8     | AT    | 7.99  | 64    | 0     | 44    | 406   | 4074  | 165   | 167   | 0     | 1654  | 0     | 11    | 2271  | 0     | 1812  | 0     | 0     | 4187  | 57.47 | 53.6  | 3.6   | 5.643 |       |
| RM9     | AT    | 8.75  | 944   | 4     | 2     | 420   | 5979  | 73    | 813   | 0     | 1106  | 1223  | 219   | 1     | 0     | 1288  | 368   | 922   | 1493  | 54.35 | 51.5  | 3.2   | 4.89  |       |
| P-value |       | >0.05 | >0.05 | >0.05 | >0.05 | >0.05 | <0.05 | >0.05 | >0.05 | >0.05 | >0.05 | >0.05 | >0.05 | <0.01 | >0.05 | >0.05 | >0.05 | >0.05 | >0.05 | >0.05 | >0.05 | >0.05 | >0.05 | >0.05 |
| Concl.  |       | NS    | NS    | NS    | NS    | NS    | *     | NS    | NS    | NS    | NS    | NS    | NS    | **    | NS    | NS    | NS    | NS    | NS    | NS    | NS    | NS    | NS    | NS    |

RA: Relative abundance  
 Concl. : conclusion  
 qPCR: log10 rRNA gene copies/mL  
 Ge: *Gemella* RA  
 Ha1: *Haemophilus*1 RA  
 Sta: *Staphylococcus aureus* RA  
 Pre1: *Prevotella* 1 RA  
 Str1: *Streptococcus* 1(*S. mitis* group)  
 NS: Not significant

Pept: *Peptostreptococcus* RA  
 Str2: *Streptococcus* 2 (*S. salivarius* group)  
 Neis1: *Neisseria* 1 RA  
 Fus1: *Fusobacterium* 1 RA  
 Rot1: *Rothia* 1 RA  
 Vei1: *Veillonella* 1 RA  
 Por1: *Pophyromonas* 1 RA  
 Neis2: *Neisseria* 2 RA  
 \*: Significant

Pre2: *Prevotella* 2 RA  
 Rot2: *Rothia* 2 RA  
 Str3: *Streptococcus* 3 (*S. anginosus* group)  
 Other: OTUs out of major core microbiota  
 ObsSp: Observed species  
 Shan: Shannon  
 PDwt: Phylogenetic diversity whole tree  
 \*\*: Highly significant
