# Supplementary material for: Impact of the CFTR-Potentiator Ivacaftor on Airway Microbiota in Cystic Fibrosis Patients Carrying A G551D Mutation
Source: PubMed Central journal article supplement (PMC4390299; doi:10.1371/journal.pone.0124124), 2015-04-08
Supplement: pone.0124124.s008.pdf [file pone.0124124.s008.pdf]

**S3 Table. Correlation (Spearman test) between relative abundance of OTUs belonging to the major core microbiota and qPCR results.**

|       | Ge          | Ha1         | Sta          | Pre1         | Str1         | Pept         | Str2         | Neis1        | Fus1         | Rot1         | Vei1        | Por1         | Neis2       | Pre2         | Rot2         | Str3         | Oth          | qPCR         |
|-------|-------------|-------------|--------------|--------------|--------------|--------------|--------------|--------------|--------------|--------------|-------------|--------------|-------------|--------------|--------------|--------------|--------------|--------------|
| Ge    | 1           | <b>0.46</b> | -0.06        | 0.20         | 0.22         | -0.12        | 0.14         | 0.41         | 0.09         | 0.03         | <b>0.70</b> | -0.29        | <b>0.46</b> | -0.22        | 0.06         | <b>0.49</b>  | -0.15        | 0.07         |
| Ha1   | <b>0.46</b> | 1           | -0.29        | -0.44        | -0.44        | -0.14        | -0.22        | <b>0.93</b>  | 0.00         | -0.41        | <b>0.69</b> | 0.15         | <b>0.90</b> | -0.38        | -0.38        | 0.20         | -0.11        | <b>0.64</b>  |
| Sta   | -0.06       | -0.29       | 1            | -0.04        | 0.19         | <b>-0.55</b> | -0.21        | -0.22        | -0.31        | -0.39        | -0.37       | <b>-0.46</b> | -0.10       | -0.35        | -0.34        | 0.08         | <b>0.50</b>  | -0.16        |
| Pre1  | 0.20        | -0.44       | -0.04        | 1            | 0.34         | 0.25         | <b>0.65</b>  | -0.41        | 0.28         | <b>0.53</b>  | 0.23        | -0.05        | -0.33       | <b>0.61</b>  | <b>0.58</b>  | -0.03        | -0.19        | <b>-0.76</b> |
| Str1  | 0.22        | -0.44       | 0.19         | 0.34         | 1            | -0.10        | 0.29         | <b>-0.47</b> | -0.11        | 0.40         | -0.06       | <b>-0.44</b> | -0.42       | 0.14         | 0.39         | <b>0.56</b>  | -0.26        | -0.42        |
| Pept  | -0.12       | -0.14       | <b>-0.55</b> | 0.25         | -0.10        | 1            | 0.12         | -0.25        | 0.44         | <b>0.45</b>  | -0.08       | <b>0.68</b>  | -0.30       | <b>0.69</b>  | 0.37         | <b>-0.46</b> | -0.16        | -0.08        |
| Str2  | 0.14        | -0.22       | -0.21        | <b>0.65</b>  | 0.29         | 0.12         | 1            | -0.20        | <b>0.51</b>  | 0.27         | 0.23        | -0.10        | -0.29       | <b>0.49</b>  | 0.28         | 0.01         | -0.35        | <b>-0.67</b> |
| Neis1 | 0.41        | <b>0.93</b> | -0.22        | -0.41        | <b>-0.47</b> | -0.25        | -0.20        | 1            | -0.12        | -0.38        | <b>0.68</b> | 0.13         | <b>0.94</b> | <b>-0.46</b> | -0.33        | 0.13         | -0.09        | <b>0.57</b>  |
| Fus1  | 0.09        | 0.00        | -0.31        | 0.28         | -0.11        | 0.44         | <b>0.51</b>  | -0.12        | 1            | -0.12        | -0.03       | 0.42         | -0.15       | 0.39         | -0.12        | <b>-0.45</b> | -0.22        | -0.36        |
| Rot1  | 0.03        | -0.41       | -0.39        | <b>0.53</b>  | 0.40         | <b>0.45</b>  | 0.27         | -0.38        | -0.12        | 1            | 0.09        | -0.05        | -0.37       | <b>0.51</b>  | <b>0.97</b>  | 0.24         | <b>-0.46</b> | -0.27        |
| Vei1  | <b>0.70</b> | <b>0.69</b> | -0.37        | 0.23         | -0.06        | -0.08        | 0.23         | <b>0.68</b>  | -0.03        | 0.09         | 1           | -0.04        | <b>0.66</b> | -0.08        | 0.13         | 0.43         | -0.37        | 0.23         |
| Por1  | -0.29       | 0.15        | <b>-0.46</b> | -0.05        | <b>-0.44</b> | <b>0.68</b>  | -0.10        | 0.13         | 0.42         | -0.05        | -0.04       | 1            | 0.10        | 0.38         | -0.08        | <b>-0.58</b> | -0.15        | 0.16         |
| Neis2 | <b>0.46</b> | <b>0.90</b> | -0.10        | -0.33        | -0.42        | -0.30        | -0.29        | <b>0.94</b>  | -0.15        | -0.37        | <b>0.66</b> | 0.10         | 1           | -0.41        | -0.29        | 0.21         | -0.04        | <b>0.52</b>  |
| Pre2  | -0.22       | -0.38       | -0.35        | <b>0.61</b>  | 0.14         | <b>0.69</b>  | <b>0.49</b>  | <b>-0.46</b> | 0.39         | <b>0.51</b>  | -0.08       | 0.38         | -0.41       | 1            | <b>0.50</b>  | -0.28        | -0.21        | <b>-0.56</b> |
| Rot2  | 0.06        | -0.38       | -0.34        | <b>0.58</b>  | 0.39         | 0.37         | 0.28         | -0.33        | -0.12        | <b>0.97</b>  | 0.13        | -0.08        | -0.29       | <b>0.50</b>  | 1            | 0.24         | <b>-0.49</b> | -0.32        |
| Str3  | <b>0.49</b> | 0.20        | 0.08         | -0.03        | <b>0.56</b>  | <b>-0.46</b> | 0.01         | 0.13         | <b>-0.45</b> | 0.24         | 0.43        | <b>-0.58</b> | 0.21        | -0.28        | 0.24         | 1            | -0.27        | 0.18         |
| Oth   | -0.15       | -0.11       | <b>0.50</b>  | -0.19        | -0.26        | -0.16        | -0.35        | -0.09        | -0.22        | <b>-0.46</b> | -0.37       | -0.15        | -0.04       | -0.21        | <b>-0.49</b> | -0.27        | 1            | -0.08        |
| qPCR  | 0.07        | <b>0.64</b> | -0.16        | <b>-0.76</b> | -0.42        | -0.08        | <b>-0.67</b> | <b>0.57</b>  | -0.36        | -0.27        | 0.23        | 0.16         | <b>0.52</b> | <b>-0.56</b> | -0.32        | 0.18         | -0.08        | 1            |

Ge: *Gemella*

Ha1: *Haemophilus* 1

Sta: *Staphylococcus aureus*

Pre1: *Prevotella* 1

Str1: *Streptococcus* 1 (*S. mitis* group)

Pept: *Peptostreptococcus*

Str2: *Streptococcus* 2 (*S. salivarius* group)

Neis1: *Neisseria* 1

Fus1: *Fusobacterium* 1

Rot1: *Rothia* 1

Vei1: *Veillonella* 1

Por1: *Porphyrromonas* 1

Neis2: *Neisseria*

Pre2: *Prevotella* 2

Rot2: *Rothia* 2

Str3: *Streptococcus* 3 (*S. anginosus* group)

Oth: OTUs out of the major core microbiota
