# Supplementary material for: Impact of the CFTR-Potentiator Ivacaftor on Airway Microbiota in Cystic Fibrosis Patients Carrying A G551D Mutation
Source: PubMed Central journal article supplement (PMC4390299; doi:10.1371/journal.pone.0124124), 2015-04-08
Supplement: pone.0124124.s009.pdf [file pone.0124124.s009.pdf]

**S4 Table. Uncorrected p-values associated with Spearman correlations between relative abundance of OTUs belonging to the major core microbiota and qPCR results.**

| /     | Ge            | Ha1           | Sta           | Pre1           | Str1          | Pept          | Str2          | Neis1          | Fus1          | Rot1           | Vei1          | Por1          | Neis2          | Pre2          | Rot2           | Str3          | Oth           | qPCR    |
|-------|---------------|---------------|---------------|----------------|---------------|---------------|---------------|----------------|---------------|----------------|---------------|---------------|----------------|---------------|----------------|---------------|---------------|---------|
| Ge    | /             | <b>0.04</b>   | 0.8018        | 0.3977         | 0.3404        | 0.6197        | 0.5585        | 0.0755         | 0.6934        | 0.8973         | <b>0.0006</b> | 0.2179        | <b>0.0425</b>  | 0.3488        | 0.8035         | <b>0.0265</b> | 0.5309        | 0.7623  |
| Ha1   | <b>0.04</b>   | /             | 0.2184        | 0.0516         | 0.0521        | 0.5564        | 0.3403        | <b>4.1e-09</b> | 0.9839        | 0.0716         | <b>0.0007</b> | 0.5361        | <b>9.10-8</b>  | 0.0976        | 0.0976         | 0.3978        | 0.6344        | 0.0023  |
| Sta   | 0.8018        | 0.2184        | /             | 0.8697         | 0.432         | <b>0.0112</b> | 0.3842        | 0.3508         | 0.185         | 0.0895         | 0.1053        | 0.0395        | 0.664          | 0.1343        | 0.1484         | 0.7235        | <b>0.0264</b> | 0.5052  |
| Pre1  | 0.3977        | 0.0516        | 0.8697        | /              | 0.1484        | 0.2851        | <b>0.0018</b> | 0.0734         | 0.2272        | <b>0.0171</b>  | 0.3259        | 0.8304        | 0.1527         | <b>0.0041</b> | <b>0.0069</b>  | 0.8949        | 0.4274        | 10.10-5 |
| Str1  | 0.3404        | 0.0521        | 0.432         | 0.1484         | /             | 0.6608        | 0.217         | <b>0.0373</b>  | 0.645         | 0.0844         | 0.8011        | 0.0496        | 0.0639         | 0.5608        | 0.0896         | <b>0.0106</b> | 0.2709        | 0.0666  |
| Pept  | 0.6197        | 0.5564        | <b>0.0112</b> | 0.2851         | 0.6608        | /             | 0.6109        | 0.2909         | 0.0539        | <b>0.0453</b>  | 0.7239        | <b>0.0011</b> | 0.2014         | <b>0.0008</b> | 0.1043         | <b>0.0418</b> | 0.5058        | 0.7382  |
| Str2  | 0.5585        | 0.3403        | 0.3842        | <b>0.0018</b>  | 0.217         | 0.6109        | /             | 0.3959         | <b>0.0208</b> | 0.2567         | 0.3227        | 0.6701        | 0.2171         | <b>0.0282</b> | 0.2246         | 0.9799        | 0.1264        | 0.0012  |
| Neis1 | 0.0755        | <b>4.10-9</b> | 0.3508        | 0.0734         | <b>0.0373</b> | 0.2909        | 0.3959        | /              | 0.6033        | 0.0946         | <b>0.001</b>  | 0.5843        | <b>7.10-10</b> | <b>0.0419</b> | 0.153          | 0.5962        | 0.7085        | 0.0081  |
| Fus1  | 0.6934        | 0.9839        | 0.185         | 0.2272         | 0.645         | 0.0539        | <b>0.0208</b> | 0.6033         | /             | 0.6045         | 0.8949        | 0.0649        | 0.5416         | 0.0856        | 0.609          | <b>0.0467</b> | 0.349         | 0.1196  |
| Rot1  | 0.8973        | 0.0716        | 0.0895        | <b>0.0171</b>  | 0.0844        | <b>0.0453</b> | 0.2567        | 0.0946         | 0.6045        | /              | 0.7052        | 0.8354        | 0.1069         | <b>0.0217</b> | <b>7.10-13</b> | 0.3038        | <b>0.0435</b> | 0.2457  |
| Vei1  | <b>0.0006</b> | <b>0.0007</b> | 0.1053        | 0.3259         | 0.8011        | 0.7239        | 0.3227        | <b>0.001</b>   | 0.8949        | 0.7052         | /             | 0.8749        | <b>0.0015</b>  | 0.7527        | 0.5912         | 0.0565        | 0.1131        | 0.3291  |
| Por1  | 0.2179        | 0.5361        | <b>0.0395</b> | 0.8304         | <b>0.0496</b> | <b>0.0011</b> | 0.6701        | 0.5843         | 0.0649        | 0.8354         | 0.8749        | /             | 0.6889         | 0.1           | 0.7288         | <b>0.0071</b> | 0.5288        | 0.4937  |
| Neis2 | <b>0.0425</b> | <b>9.10-8</b> | 0.664         | 0.1527         | 0.0639        | 0.2014        | 0.2171        | <b>7.10-10</b> | 0.5416        | 0.1069         | <b>0.0015</b> | 0.6889        | /              | 0.0696        | 0.2094         | 0.3747        | 0.8637        | 0.3291  |
| Pre2  | 0.3488        | 0.0976        | 0.1343        | <b>0.0041</b>  | 0.5608        | <b>0.0008</b> | <b>0.0282</b> | <b>0.0419</b>  | 0.0856        | <b>0.0217</b>  | 0.7527        | 0.1           | 0.0696         | /             | <b>0.0261</b>  | 0.2376        | 0.3695        | 0.4937  |
| Rot2  | 0.8035        | 0.0976        | 0.1484        | <b>0.0069</b>  | 0.0896        | 0.1043        | 0.2246        | 0.153          | 0.609         | <b>7.10-13</b> | 0.5912        | 0.7288        | 0.2094         | <b>0.0261</b> | /              | 0.3069        | <b>0.0271</b> | 0.4937  |
| Str3  | <b>0.0265</b> | 0.3978        | 0.7235        | 0.8949         | <b>0.0106</b> | <b>0.0418</b> | 0.9799        | 0.5962         | <b>0.0467</b> | 0.3038         | 0.0565        | <b>0.0071</b> | 0.3747         | 0.2376        | 0.3069         | /             | 0.243         | 0.4937  |
| Oth   | 0.5309        | 0.6344        | <b>0.0264</b> | 0.4274         | 0.2709        | 0.5058        | 0.1264        | 0.7085         | 0.349         | <b>0.0435</b>  | 0.1131        | 0.5288        | 0.8637         | 0.3695        | <b>0.0271</b>  | 0.243         | /             | 0.4937  |
| qPCR  | 0.7623        | <b>0.0023</b> | 0.5052        | <b>10.10-5</b> | 0.0666        | 0.7382        | <b>0.0012</b> | <b>0.0081</b>  | 0.1196        | 0.2457         | 0.3291        | 0.4937        | <b>0.0188</b>  | <b>0.0108</b> | 0.1623         | 0.4465        | 0.7527        |         |

Significant correlations are represented in bold (uncorrected p-values, threshold: 0.05).

Ge: *Gemella*  
 Ha1: *Haemophilus* 1  
 Sta: *Staphylococcus aureus*  
 Pre1: *Prevotella* 1  
 Str1: *Streptococcus* 1 (Mitis group)  
 Pept: *Peptostreptococcus*

Str2: *Streptococcus* 2 (Salivarius group)  
 Neis1: *Neisseria* 1  
 Fus1: *Fusobacterium* 1  
 Rot1: *Rothia* 1  
 Vei1: *Veillonella* 1  
 Por1: *Pophyromonas* 1

Neis2: *Neisseria* 2  
 Pre2: *Prevotella* 2  
 Rot2: *Rothia* 2  
 Str3: *Streptococcus* 3  
 Oth: OTUs out of the major core microbiota
